# Supplementary material for: Mental health-related healthcare service utilisation and psychotropic drug dispensation trends in British Columbia during COVID-19 pandemic: a population-based study
Source: HighWire-hosted journal article supplement (doi:10.1136/gpsych-2022-100941), 2023-02-01
Supplement: gpsych-2022-100941supp001_data_supplement.pdf [file gpsych-2022-100941supp001_data_supplement.pdf]

Table S1. Data Sources integrated within the BC COVID-19 Cohort (BCC19C)

| British Columbia Centre for Disease Control (BCCDC), Provincial Health Services Authority (PHSA) and Regional Health Authority data sources                    | Data Date Ranges  |
|----------------------------------------------------------------------------------------------------------------------------------------------------------------|-------------------|
| Integrated COVID-19 laboratory dataset (SARS-CoV2 tests from private/public labs) <sup>S1</sup>                                                                | Jan,2020-onward   |
| COVID-19 surveillance case data (information collected on all probable/confirmed cases as part of public health follow up) <sup>S2</sup>                       | Jan,2020-onward   |
| Provincial COVID-19 Monitoring Solution (critical and non-critical care hospital census data) <sup>S3</sup>                                                    | Jan,2020-onward   |
| Provincial Immunizations Registry (COVID-19 vaccination data) <sup>S4</sup>                                                                                    | Dec,2020-onward   |
| Provincial Laboratory Information Solution (laboratory tests from private/public labs) <sup>S5</sup>                                                           | Jan,2020-onward   |
| Public Health Reporting Data warehouse (Influenza laboratory tests) <sup>S6</sup>                                                                              | Jan,2008-onward   |
| Emergency department visits (hospital-based and community-based ambulatory care)                                                                               | Mar,2020-onward   |
| Ministry of Health (MoH) Administrative Data Sources:                                                                                                          | Data Date Ranges: |
| Client Roster (CR) (registry of enrollment in the universal public health insurance plan including residential history) <sup>S7</sup>                          | 2008/9-onward     |
| Discharge Abstracts Database (DAD) (hospital discharge records) <sup>S8</sup>                                                                                  | 2008/9-onward     |
| Medical Services Plan (MSP) (physician diagnostic and billing data for services provided through universal public health insurance plan) <sup>S9</sup>         | 2008/9-onward     |
| PharmaNet (Pharma) (prescription drugs dispensed from community pharmacies, includes medications covered by public and private insurance plans) <sup>S10</sup> | 2008/9-onward     |
| BC Vital Statistics (VS) (deaths registry) <sup>S11</sup>                                                                                                      | 2008/9-onward     |
| National Ambulatory Care Reporting System (NACRS) (hospital-based and community-based ambulatory care) <sup>S12</sup>                                          | 2011/12-onward    |
| Chronic Disease Registry <sup>S13</sup>                                                                                                                        | 2008/9-2018/19    |
| 811 Calls (respiratory calls only) <sup>S14</sup>                                                                                                              | 2014-onward       |
| Health System Matrix <sup>S15</sup>                                                                                                                            | 2018/19-onward    |
| Population Grouper Methodology <sup>S16</sup>                                                                                                                  | 2008/9-onward     |

Table S2. ICD-9 and ICD-10 diagnostic codes used in the manuscript

| Disorder Group                                       | ICD-9 Code<br>(Outpatient Physician Visits Data) |                                               | ICD-10 Code<br>(Hospital Discharge Data) |                                                                |
|------------------------------------------------------|--------------------------------------------------|-----------------------------------------------|------------------------------------------|----------------------------------------------------------------|
| Depressive or anxiety disorders                      | 300                                              | Neurotic disorders                            | F40                                      | Phobic anxiety disorders                                       |
|                                                      | 311                                              | Depressive disorder, not elsewhere classified | F41                                      | Other anxiety disorders                                        |
|                                                      | B50                                              | Anxiety/depression                            | F32                                      | Depressive episode                                             |
|                                                      |                                                  |                                               | F33                                      | Recurrent depressive disorders                                 |
|                                                      |                                                  |                                               | F34.1                                    | Dysthymia                                                      |
| Schizophrenia spectrum and other psychotic disorders | 295                                              | Schizophrenic psychoses                       | F20                                      | Schizophrenia                                                  |
|                                                      | 297                                              | Paranoid states                               | F21                                      | Schizotypal disorder                                           |
|                                                      | 298                                              | Other nonorganic psychoses                    | F22                                      | Persistent delusional disorders                                |
|                                                      |                                                  |                                               | F23                                      | Acute and transient psychotic disorders                        |
|                                                      |                                                  |                                               | F24                                      | Induced delusional disorder                                    |
|                                                      |                                                  |                                               | F25                                      | Schizoaffective disorders                                      |
|                                                      |                                                  |                                               | F28                                      | Other nonorganic psychotic disorders                           |
|                                                      |                                                  | F29                                           | Unspecified nonorganic psychosis         |                                                                |
| Bipolar and related disorders                        | 296                                              | Affective psychoses                           | F30                                      | Manic episode                                                  |
|                                                      |                                                  |                                               | F31                                      | Bipolar affective disorder                                     |
|                                                      |                                                  |                                               | F34                                      | Persistent mood [affective] disorders (excluding 34.1)         |
|                                                      |                                                  |                                               | F38                                      | Other mood [affective] disorders                               |
| Eating disorders                                     | 307.1                                            | Anorexia nervosa                              | F50                                      | Eating disorders                                               |
|                                                      | 307.5                                            | Other unspecified disorders of eating         |                                          |                                                                |
| Personality disorders                                | 301                                              | Personality disorders                         | F60                                      | Specific personality disorders                                 |
|                                                      |                                                  |                                               | F61                                      | Mixed and other personality disorders                          |
|                                                      |                                                  |                                               | F62                                      | Enduring personality changes, not attributable to brain damage |

Table S3. Canadian Emergency Department Information System (CEDIS) Presenting Complaint List (PCL) codes used in the manuscript

| Disorder Group                           | PCL Codes |
|------------------------------------------|-----------|
| Depression/suicidal/deliberate self-harm | 351       |
| Anxiety/situational crisis               | 352       |
| Hallucinations/delusions                 | 353       |
| Insomnia                                 | 354       |
| Violent/homicidal behaviour              | 355       |
| Social problem                           | 356       |
| Bizarre behaviour                        | 358       |
| Concern of patient's welfare             | 359       |
| Pediatric disruptive behaviour           | 360       |

Table S4. Psychotropic medications captured in the list of drug categories

| Chemical name  | Drug category   | Chemical name   | Drug category  |
|----------------|-----------------|-----------------|----------------|
| Amitriptyline  | Antidepressants | Promazine       | Antipsychotics |
| Amoxapine      | Antidepressants | Quetiapine      | Antipsychotics |
| Atomoxetine    | Antidepressants | Risperidone     | Antipsychotics |
| Bupropion      | Antidepressants | Sulpiride       | Antipsychotics |
| Citalopram     | Antidepressants | Sulthiame       | Antipsychotics |
| Clomipramine   | Antidepressants | Thiopropazate   | Antipsychotics |
| Desipramine    | Antidepressants | Thioridazine    | Antipsychotics |
| Desvenlafaxine | Antidepressants | Trifluoperazine | Antipsychotics |
| Doxepin        | Antidepressants | Trilafon        | Antipsychotics |
| Duloxetine     | Antidepressants | Truxal          | Antipsychotics |
| Escitalopram   | Antidepressants | Alprazolam      | Anxiolytics    |
| Fluoxetine     | Antidepressants | Buspirone       | Anxiolytics    |
| Fluvoxamine    | Antidepressants | Clonazepam      | Anxiolytics    |

|                            |                 |                         |                 |
|----------------------------|-----------------|-------------------------|-----------------|
| Imipramine                 | Antidepressants | Clorazepate dipotassium | Anxiolytics     |
| Isocarboxazid              | Antidepressants | Diazepam                | Anxiolytics     |
| Maprotiline                | Antidepressants | Lorazepam               | Anxiolytics     |
| Mirtazapine                | Antidepressants | Bromazepam              | Sedatives       |
| Moclobemide                | Antidepressants | Chloral hydrate         | Sedatives       |
| Nortriptyline              | Antidepressants | Chlordiazepoxide        | Sedatives       |
| Paroxetine                 | Antidepressants | Flurazepam              | Sedatives       |
| Perphenazine/amitriptyline | Antidepressants | Nitrazepam              | Sedatives       |
| Phenelzine                 | Antidepressants | Oxazepam                | Sedatives       |
| Protriptyline              | Antidepressants | Temazepam               | Sedatives       |
| Sertraline                 | Antidepressants | Triazolam               | Sedatives       |
| Zaleplon                   | Sedatives       | Tranlycypromine         | Antidepressants |
| Zolpidem                   | Sedatives       | Trazodone               | Antidepressants |
| Zopiclone                  | Sedatives       | Trimipramine            | Antidepressants |
| Vilazodone                 | Antidepressants | Dogmatil                | Antipsychotics  |
| Vortioxetine               | Antidepressants | Fluphenazine            | Antipsychotics  |
| Venlafaxine                | Antidepressants | Haloperidol             | Antipsychotics  |
| Ziprasidone                | Antipsychotics  | Loxapine                | Antipsychotics  |
| Amisulpride                | Antipsychotics  | Lurasidone              | Antipsychotics  |
| Aripiprazole               | Antipsychotics  | Methotrimeprazine       | Antipsychotics  |
| Asenapine                  | Antipsychotics  | Olanzapine              | Antipsychotics  |
| Brexipiprazole             | Antipsychotics  | Paliperidone            | Antipsychotics  |
| Chlorpromazine             | Antipsychotics  | Perphenazine            | Antipsychotics  |
| Clozapine                  | Antipsychotics  |                         |                 |

Table S5. Monthly average numbers and rates for mental health-related outpatient physician visits, in British Columbia (2019-2020)

|                      | Outpatient physician visits      |                                                 |                                  |                                                 |                                  |                                                 |                                   |          |
|----------------------|----------------------------------|-------------------------------------------------|----------------------------------|-------------------------------------------------|----------------------------------|-------------------------------------------------|-----------------------------------|----------|
|                      | 2019                             |                                                 | 2020                             |                                                 | 2021                             |                                                 | 2021 vs. 2019 Rate Ratio (95% CI) | P-value* |
|                      | Average monthly number of visits | Average monthly rate of visits (per 1,000 pop.) | Average monthly number of visits | Average monthly rate of visits (per 1,000 pop.) | Average monthly number of visits | Average monthly rate of visits (per 1,000 pop.) |                                   |          |
| Overall              | 96,482                           | 18.9 (18.8 to 19.1)                             | 107,765                          | 20.9 (20.8 to 21.1)                             | 119,653                          | 23.1 (23.0 to 23.2)                             | 1.24 (1.23 to 1.25)               | <0.0001  |
| Sex                  |                                  |                                                 |                                  |                                                 |                                  |                                                 |                                   |          |
| Female               | 52,607                           | 20.4 (20.3 to 20.6)                             | 60,116                           | 23.1 (22.9 to 23.3)                             | 68,300                           | 26.1 (25.9 to 26.3)                             | 1.30 (1.28 to 1.31)               | <0.0001  |
| Male                 | 43,875                           | 17.4 (17.2 to 17.6)                             | 47,649                           | 18.7 (18.5 to 18.9)                             | 51,353                           | 20.0 (19.8 to 20.2)                             | 1.17 (1.16 to 1.19)               | <0.0001  |
| Age groups           |                                  |                                                 |                                  |                                                 |                                  |                                                 |                                   |          |
| <5                   | 140                              | 0.6 (0.5 to 0.7)                                | 143                              | 0.6 (0.5 to 0.7)                                | 186                              | 0.8 (0.7 to 1.0)                                | 1.35 (1.08 to 1.68)               | 0.0074   |
| 5-9                  | 2,373                            | 9.8 (9.4 to 10.2)                               | 2,569                            | 10.5 (10.1 to 10.9)                             | 2,963                            | 12.1 (11.7 to 12.6)                             | 1.24 (1.17 to 1.31)               | <0.0001  |
| 10-14                | 3,761                            | 15.3 (14.9 to 15.8)                             | 4,425                            | 17.8 (17.2 to 18.3)                             | 5,545                            | 22.2 (21.6 to 22.8)                             | 1.45 (1.39 to 1.51)               | <0.0001  |
| 15-19                | 6,044                            | 21.8 (21.2 to 22.3)                             | 6,701                            | 24.6 (24.0 to 25.2)                             | 8,247                            | 32.8 (32.1 to 33.5)                             | 1.51 (1.46 to 1.56)               | <0.0001  |
| 20-29                | 16,467                           | 23.5 (23.2 to 23.9)                             | 18,459                           | 26.4 (26.0 to 26.8)                             | 22,019                           | 31.3 (30.9 to 31.7)                             | 1.10 (0.99 to 1.21)               | <0.0001  |
| 30-39                | 17,012                           | 23.6 (23.2 to 23.9)                             | 19,987                           | 27.0 (26.6 to 27.4)                             | 22,991                           | 30.3 (29.9 to 30.7)                             | 1.28 (1.26 to 1.31)               | <0.0001  |
| 40-49                | 14,476                           | 22.3 (22.0 to 22.7)                             | 16,061                           | 24.7 (24.4 to 25.1)                             | 17,223                           | 26.3 (25.9 to 26.7)                             | 1.18 (1.15 to 1.20)               | <0.0001  |
| 50-59                | 15,034                           | 20.7 (20.4 to 21.1)                             | 15,865                           | 22.0 (21.7 to 22.4)                             | 16,120                           | 22.5 (22.1 to 22.8)                             | 1.08 (1.06 to 1.11)               | <0.0001  |
| 60-69                | 11,651                           | 17.6 (17.3 to 18.0)                             | 12,535                           | 18.6 (18.3 to 18.9)                             | 12,861                           | 18.7 (18.3 to 19.0)                             | 1.06 (1.03 to 1.09)               | <0.0001  |
| 70-79                | 6,102                            | 14.7 (14.4 to 15.1)                             | 7,099                            | 16.3 (15.9 to 16.6)                             | 7,455                            | 16.3 (16.0 to 16.7)                             | 1.11 (1.07 to 1.15)               | <0.0001  |
| 80-89                | 2,702                            | 14.7 (14.2 to 15.3)                             | 3,078                            | 16.3 (15.8 to 16.9)                             | 3,168                            | 16.3 (15.7 to 16.9)                             | 1.10 (1.05 to 1.16)               | <0.001   |
| 90+                  | 721                              | 15.6 (14.5 to 16.8)                             | 842                              | 17.6 (16.4 to 18.8)                             | 879                              | 17.1 (16.0 to 18.3)                             | 1.10 (0.99 to 1.21)               | 0.068    |
| *Chi-square analysis |                                  |                                                 |                                  |                                                 |                                  |                                                 |                                   |          |

Table S6. Monthly average numbers and rates for mental health-related emergency department visits, in British Columbia (2019-2020)

|                      | Emergency department visits      |                                                   |                                  |                                                   |                                  |                                                   |                                   |          |
|----------------------|----------------------------------|---------------------------------------------------|----------------------------------|---------------------------------------------------|----------------------------------|---------------------------------------------------|-----------------------------------|----------|
|                      | 2019                             |                                                   | 2020                             |                                                   | 2021                             |                                                   | 2021 vs. 2019 Rate Ratio (95% CI) | P-value* |
|                      | Average monthly number of visits | Average monthly rate of visits (per 100,000 pop.) | Average monthly number of visits | Average monthly rate of visits (per 100,000 pop.) | Average monthly number of visits | Average monthly rate of visits (per 100,000 pop.) |                                   |          |
| Overall              | 5,266                            | 103.5 (100.7 to 106.4)                            | 5,011                            | 97.7 (95.0 to 100.5)                              | 5,531                            | 107.9 (105.1 to 110.8)                            |                                   |          |
| Sex                  |                                  |                                                   |                                  |                                                   |                                  |                                                   |                                   |          |
| Female               | 2,639                            | 102.7 (98.8 to 106.7)                             | 2,478                            | 95.7 (91.9 to 99.5)                               | 2,840                            | 109.9 (105.9 to 114.1)                            | 1.08 (1.02 to 1.13)               | 0.0068   |
| Male                 | 2,626                            | 104.2 (100.3 to 108.3)                            | 2,533                            | 99.6 (95.8 to 103.6)                              | 2,691                            | 105.5 (101.5 to 109.6)                            | 1.02 (0.97 to 1.08)               | 0.37     |
| Age groups           |                                  |                                                   |                                  |                                                   |                                  |                                                   |                                   |          |
| <5                   | 14                               | 6.2 (3.7 to 10.3)                                 | 13                               | 5.9 (3.4 to 9.8)                                  | 13                               | 5.8 (3.1 to 9.4)                                  | 0.93 (0.43 to 1.99)               | 0.85     |
| 5-9                  | 51                               | 20.8 (15.7 to 27.2)                               | 34                               | 14.1 (10.0 to 19.5)                               | 43                               | 17.5 (12.7 to 23.2)                               | 0.84 (0.56 to 1.26)               | 0.40     |
| 10-14                | 257                              | 104.9 (92.8 to 118.5)                             | 245                              | 98.1 (86.4 to 111.0)                              | 342                              | 136.9 (122.9 to 151.9)                            | 1.31 (1.11 to 1.54)               | 0.0013   |
| 15-19                | 630                              | 227.0 (209.8 to 245.3)                            | 561                              | 205.9 (189.4 to 223.5)                            | 679                              | 270.0 (250.4 to 291.0)                            | 1.19 (1.07 to 1.33)               | 0.0017   |
| 20-29                | 1,296                            | 185.2 (175.3 to 195.6)                            | 1,253                            | 179.3 (169.5 to 189.4)                            | 1,325                            | 188.4 (178.4 to 198.7)                            | 1.02 (0.94 to 1.10)               | 0.67     |
| 30-39                | 996                              | 138.1 (129.8 to 147.0)                            | 1,002                            | 135.3 (127.1 to 143.9)                            | 1,104                            | 145.4 (137.0 to 154.2)                            | 1.05 (0.97 to 1.15)               | 0.24     |
| 40-49                | 717                              | 110.7 (102.9 to 119.1)                            | 684                              | 105.3 (97.6 to 113.4)                             | 733                              | 112.1 (104.3 to 120.5)                            | 1.01 (0.91 to 1.12)               | 0.81     |
| 50-59                | 602                              | 83.0 (76.6 to 89.9)                               | 558                              | 77.4 (71.1 to 84.0)                               | 582                              | 81.2 (74.7 to 88.0)                               | 0.98 (0.87 to 1.10)               | 0.70     |
| 60-69                | 359                              | 54.3 (48.9 to 60.1)                               | 336                              | 49.8 (44.7 to 55.5)                               | 359                              | 52.0 (46.8 to 57.6)                               | 0.96 (0.83 to 1.11)               | 0.57     |
| 70-79                | 190                              | 45.8 (39.6 to 52.7)                               | 190                              | 43.6 (37.7 to 50.2)                               | 199                              | 43.5 (37.7 to 49.8)                               | 0.95 (0.78 to 1.16)               | 0.61     |
| 80-89                | 118                              | 64.4 (53.3 to 76.5)                               | 104                              | 55.2 (45.6 to 66.9)                               | 121                              | 62.3 (52.1 to 74.4)                               | 0.97 (0.75 to 1.25)               | 0.80     |
| 90+                  | 36                               | 77.5 (54.8 to 105.7)                              | 32                               | 67.3 (47.4 to 94.3)                               | 32                               | 62.1 (42.7 to 85.9)                               | 0.80 (0.50 to 1.29)               | 0.37     |
| *Chi-square analysis |                                  |                                                   |                                  |                                                   |                                  |                                                   |                                   |          |

Table S7. Monthly average numbers and rates for mental health-related hospital admissions, in British Columbia (2019-2020)

|                                                                                                                                                                                                                             | Hospital admissions                  |                                                       |                                      |                                                       |                                      |                                               |                                                |         |
|-----------------------------------------------------------------------------------------------------------------------------------------------------------------------------------------------------------------------------|--------------------------------------|-------------------------------------------------------|--------------------------------------|-------------------------------------------------------|--------------------------------------|-----------------------------------------------|------------------------------------------------|---------|
|                                                                                                                                                                                                                             | 2019                                 |                                                       | 2020                                 |                                                       | 2021*                                |                                               | 2021 vs. 2019 Rate Ratio <sup>#</sup> (95% CI) | P-value |
|                                                                                                                                                                                                                             | Average monthly number of admissions | Average monthly rate of admissions (per 100,000 pop.) | Average monthly number of admissions | Average monthly rate of admissions (per 100,000 pop.) | Average monthly number of admissions | Average monthly admissions (per 100,000 pop.) |                                                |         |
| Overall                                                                                                                                                                                                                     | 1,449                                | 28.5 (27.0 to 30.0)                                   | 1,404                                | 27.4 (26.0 to 28.9)                                   | 1,493                                | 29.1 (27.6 to 30.6)                           | 1.03 (0.96 to 1.11)                            | 0.41    |
| Sex                                                                                                                                                                                                                         |                                      |                                                       |                                      |                                                       |                                      |                                               |                                                |         |
| Female                                                                                                                                                                                                                      | 755                                  | 29.3 (27.3 to 31.5)                                   | 722                                  | 27.8 (25.8 to 30.0)                                   | 819                                  | 31.6 (29.5 to 33.9)                           | 1.08 (0.98 to 1.20)                            | 0.11    |
| Male                                                                                                                                                                                                                        | 693                                  | 27.5 (25.5 to 29.6)                                   | 682                                  | 27.4 (26.0 to 28.9)                                   | 675                                  | 26.4 (24.5 to 28.5)                           | 0.97 (0.88 to 1.08)                            | 0.62    |
| Age groups                                                                                                                                                                                                                  |                                      |                                                       |                                      |                                                       |                                      |                                               |                                                |         |
| <5                                                                                                                                                                                                                          | sp                                   | sp                                                    | sp                                   | sp                                                    | sp                                   | sp                                            | -                                              | -       |
| 5-9                                                                                                                                                                                                                         | sp                                   | sp                                                    | sp                                   | sp                                                    | sp                                   | sp                                            | -                                              | -       |
| 10-14                                                                                                                                                                                                                       | 56                                   | 23.0 (17.6 to 29.7)                                   | 57                                   | 22.9 (17.3 to 29.6)                                   | 89                                   | 35.7 (28.6 to 43.9)                           | 1.55 (1.11 to 2.17)                            | 0.010   |
| 15-19                                                                                                                                                                                                                       | 178                                  | 64.0 (55.0 to 73.9)                                   | 163                                  | 59.8 (51.0 to 69.4)                                   | 181                                  | 72.1 (62.2 to 83.2)                           | 1.13 (0.92 to 1.39)                            | 0.26    |
| 20-29                                                                                                                                                                                                                       | 332                                  | 47.5 (42.6 to 52.8)                                   | 330                                  | 47.2 (42.3 to 52.5)                                   | 348                                  | 49.5 (44.6 to 55.0)                           | 1.04 (0.90 to 1.21)                            | 0.58    |
| 30-39                                                                                                                                                                                                                       | 261                                  | 36.2 (31.9 to 40.9)                                   | 259                                  | 35.0 (30.9 to 39.5)                                   | 280                                  | 36.8 (32.7 to 41.3)                           | 1.02 (0.86 to 1.20)                            | 0.85    |
| 40-49                                                                                                                                                                                                                       | 198                                  | 30.6 (26.6 to 35.1)                                   | 198                                  | 30.5 (26.4 to 34.9)                                   | 199                                  | 30.5 (26.5 to 35.0)                           | 1.00 (0.82 to 1.21)                            | 0.97    |
| 50-59                                                                                                                                                                                                                       | 184                                  | 25.4 (22.0 to 29.3)                                   | 177                                  | 24.5 (21.1 to 28.3)                                   | 168                                  | 23.4 (20.0 to 27.1)                           | 0.92 (0.75 to 1.13)                            | 0.433   |
| 60-69                                                                                                                                                                                                                       | 135                                  | 20.4 (17.1 to 24.0)                                   | 123                                  | 18.2 (15.2 to 21.6)                                   | 124                                  | 18.0 (15.0 to 21.3)                           | 0.88 (0.69 to 1.13)                            | 0.32    |
| 70-79                                                                                                                                                                                                                       | 66                                   | 15.8 (12.3 to 20.0)                                   | 65                                   | 14.9 (11.7 to 19.0)                                   | 70                                   | 15.2 (11.9 to 19.1)                           | 0.96 (0.69 to 1.35)                            | 0.82    |
| 80-89                                                                                                                                                                                                                       | 29                                   | 16.1 (11.0 to 22.7)                                   | 26                                   | 13.5 (9.0 to 19.6)                                    | 25                                   | 12.9 (8.7 to 19.0)                            | 0.80 (0.47 to 1.37)                            | 0.42    |
| 90+                                                                                                                                                                                                                         | sp                                   | sp                                                    | sp                                   | sp                                                    | sp                                   | sp                                            | -                                              | -       |
| <sup>#</sup> Calculated using data between January and November 2019/2020/2021.<br><sup>*</sup> Chi-square analysis.<br>sp=Suppressed.<br>Due to lag in data, hospitalisation data for October-December 2021 were excluded. |                                      |                                                       |                                      |                                                       |                                      |                                               |                                                |         |

Table S8. Monthly average numbers and rates for psychotropic drug dispensations, in British Columbia (2019-2020)

|            | Psychotropic drug dispensations                        |                                                                          |                                                        |                                                                          |                                                        |                                                                          |                                   |          |
|------------|--------------------------------------------------------|--------------------------------------------------------------------------|--------------------------------------------------------|--------------------------------------------------------------------------|--------------------------------------------------------|--------------------------------------------------------------------------|-----------------------------------|----------|
|            | 2019                                                   |                                                                          | 2020                                                   |                                                                          | 2021                                                   |                                                                          | 2021 vs. 2019 Rate Ratio (95% CI) | P-value* |
|            | Monthly average no. of psychotropic drug dispensations | Monthly average rate of psychotropic drug dispensations (per 1,000 pop.) | Monthly average no. of psychotropic drug dispensations | Monthly average rate of psychotropic drug dispensations (per 1,000 pop.) | Monthly average no. of psychotropic drug dispensations | Monthly average rate of psychotropic drug dispensations (per 1,000 pop.) |                                   |          |
| Overall    | 441,275                                                | 85.9 (85.6 to 86.1)                                                      | 463,529                                                | 88.8 (88.5 to 89.0)                                                      | 476,817                                                | 89.9 (89.6 to 90.2)                                                      |                                   |          |
| Sex        |                                                        |                                                                          |                                                        |                                                                          |                                                        |                                                                          |                                   |          |
| Female     | 271,470                                                | 104.6 (104.2 to 105.0)                                                   | 286,313                                                | 108.5 (108.1 to 108.9)                                                   | 296,054                                                | 110.4 (110.0 to 110.8)                                                   | 1.09 (1.08 to 1.10)               | <.0001   |
| Male       | 169,804                                                | 66.8 (66.5 to 67.1)                                                      | 177,217                                                | 68.6 (68.3 to 68.9)                                                      | 180,763                                                | 68.9 (68.6 to 69.3)                                                      | 1.06 (1.05 to 1.07)               | <.0001   |
| Age groups |                                                        |                                                                          |                                                        |                                                                          |                                                        |                                                                          |                                   |          |
| <5         | 87                                                     | 0.40 (0.3 to 0.5)                                                        | 84                                                     | 0.40 (0.3 to 0.50)                                                       | 83                                                     | 0.4 (0.3 to 0.5)                                                         | -                                 | -        |
| 5-9        | 1,048                                                  | 4.3 (4.1 to 4.6)                                                         | 1,119                                                  | 4.6 (4.3 to 4.9)                                                         | 1,191                                                  | 4.9 (4.6 to 5.2)                                                         | 1.13 (1.04 to 1.22)               | .0047    |
| 10-14      | 4,016                                                  | 16.4 (15.9 to 16.9)                                                      | 4,580                                                  | 18.4 (17.9 to 18.9)                                                      | 5,561                                                  | 22.3 (21.7 to 22.9)                                                      | 1.36 (1.31 to 1.42)               | <.0001   |
| 15-19      | 11,402                                                 | 41.1 (40.3 to 41.8)                                                      | 12,306                                                 | 45.2 (44.4 to 46.0)                                                      | 14,359                                                 | 57.1 (56.2 to 58.0)                                                      | 1.39 (1.36 to 1.42)               | <.0001   |
| 20-29      | 38,828                                                 | 55.5 (54.9 to 56.1)                                                      | 42,280                                                 | 60.5 (59.9 to 61.1)                                                      | 46,177                                                 | 65.7 (65.1 to 66.3)                                                      | 1.18 (1.17 to 1.20)               | <.0001   |
| 30-39      | 50,422                                                 | 69.9 (69.3 to 70.5)                                                      | 54,832                                                 | 74.1 (73.4 to 74.7)                                                      | 58,499                                                 | 77.0 (76.4 to 77.6)                                                      | 1.10 (1.09 to 1.11)               | <.0001   |
| 40-49      | 60,262                                                 | 93.0 (92.3 to 93.8)                                                      | 62,448                                                 | 96.2 (95.4 to 96.9)                                                      | 62,967                                                 | 96.3 (95.5 to 97.1)                                                      | 1.04 (1.02 to 1.05)               | <.001    |
| 50-59      | 81,561                                                 | 112.4 (11.7 to 113.2)                                                    | 82,689                                                 | 114.7 (113.9 to 115.5)                                                   | 80,946                                                 | 112.9 (112.1 to 113.7)                                                   | 1.00 (0.99 to 1.01)               | .42      |
| 60-69      | 81,378                                                 | 123.2 (122.3 to 124.0)                                                   | 84,778                                                 | 125.8 (124.9 to 126.6)                                                   | 85,570                                                 | 124.2 (123.3 to 125.0)                                                   | 1.01 (1.00 to 1.03)               | .099     |
| 70-79      | 58,758                                                 | 142.0 (140.8 to 143.1)                                                   | 63,226                                                 | 144.8 (143.7 to 146.0)                                                   | 65,260                                                 | 142.9 (141.8 to 144.0)                                                   | 1.01 (1.00 to 1.02)               | .25      |
| 80-89      | 38,628                                                 | 210.8 (208.7 to 212.9)                                                   | 39,846                                                 | 211.5 (209.4 to 213.6)                                                   | 40,539                                                 | 208.5 (206.5 to 210.6)                                                   | 0.99 (0.98 to 1.00)               | .12      |
| 90+        | 14,884                                                 | 323.2 (318.1 to 324.4)                                                   | 15,342                                                 | 320.2 (315.1 to 325.3)                                                   | 15,666                                                 | 305.8 (301.0 to 310.3)                                                   | 0.95 (0.93 to 0.97)               | .0031    |

\*Chi-square analysis.



Figure S1. Age-standardized rates (per 1,000 population) for mental health-related outpatient physician visits, by year (2019-2021) and sex, in British Columbia

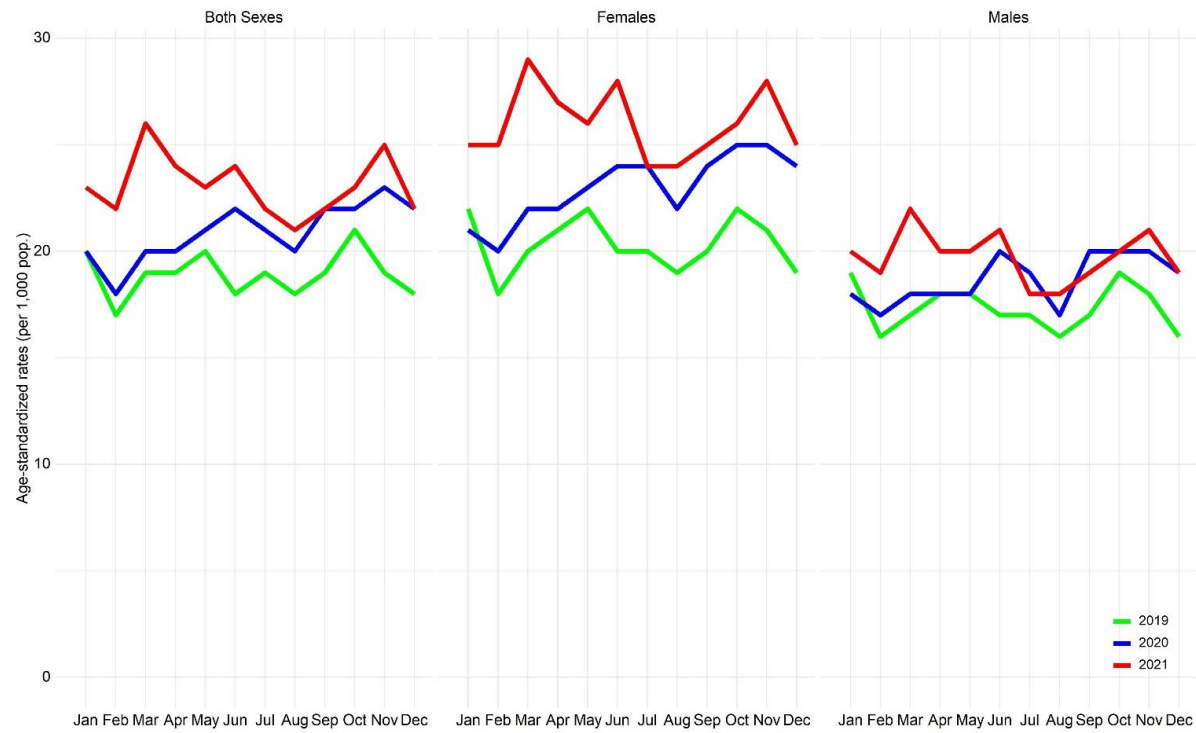

Figure S2. Age-standardized rates (per 1,000 population) for psychotropic drug dispensation, by year (2019-2021) and sex, in British Columbia

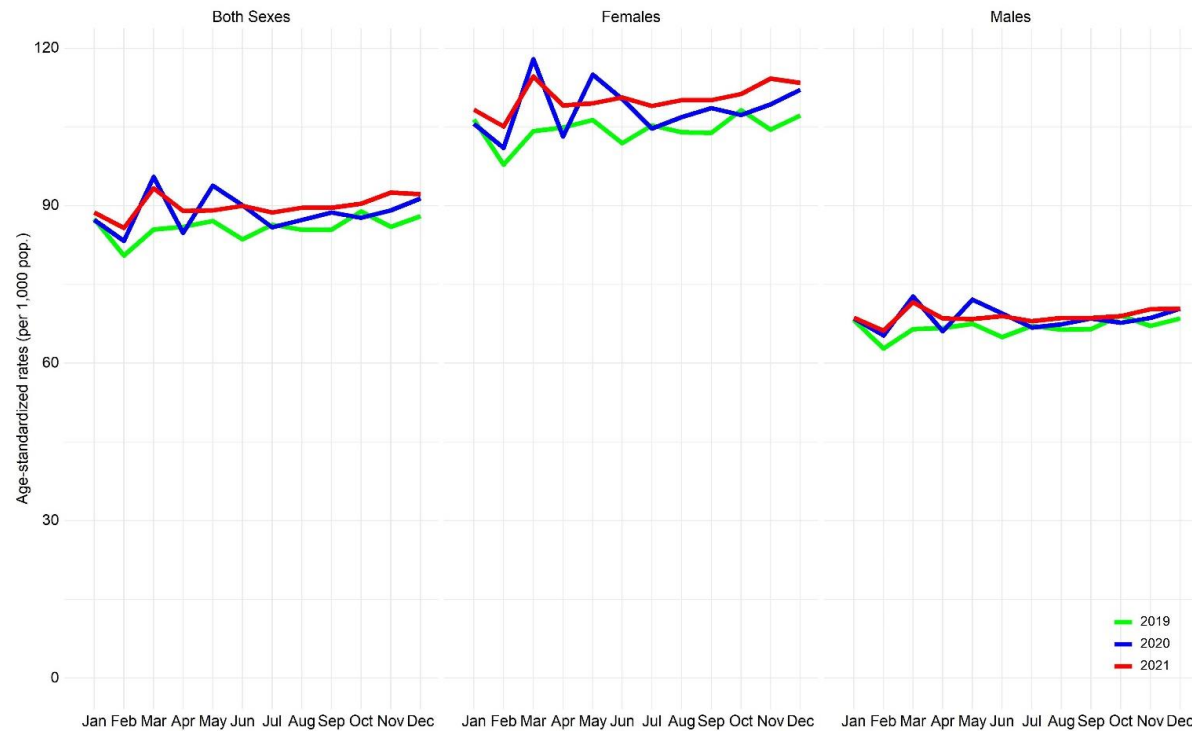

Figure S3. Age-standardized rates (per 100,000 population) for mental health-related emergency department visits, by year (2019-2021) and sex, in British Columbia

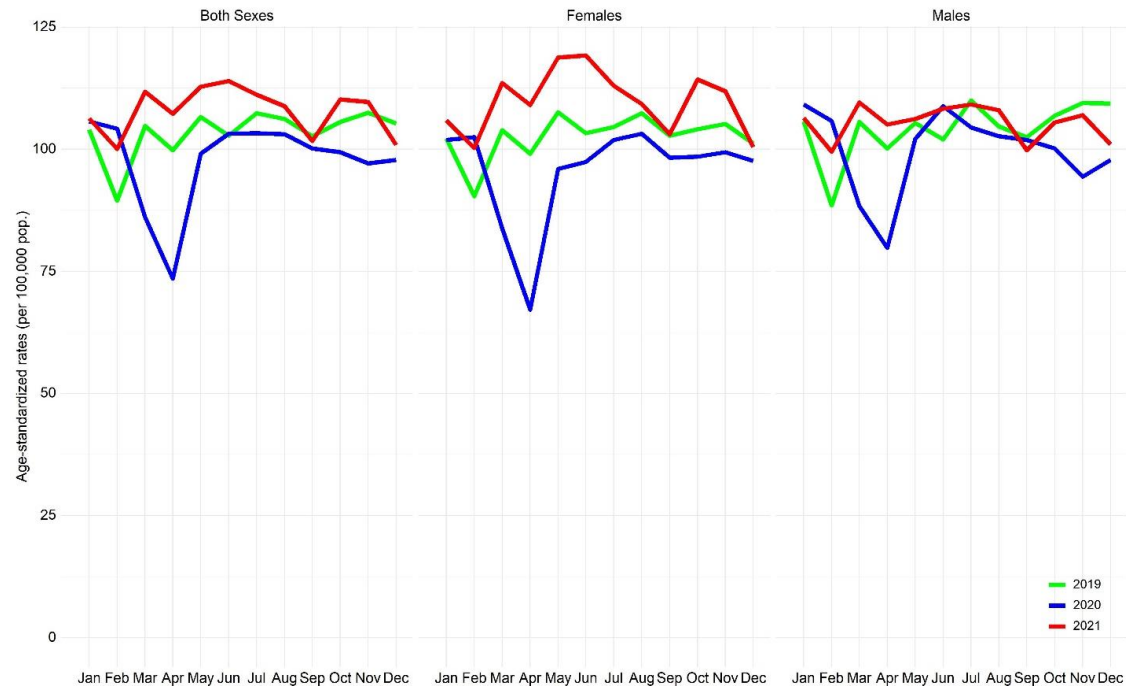

Figure S4. Age-standardized rates (per 100,000 population) for mental health-related hospital admissions, by year (2019-2021) and sex, in British Columbia

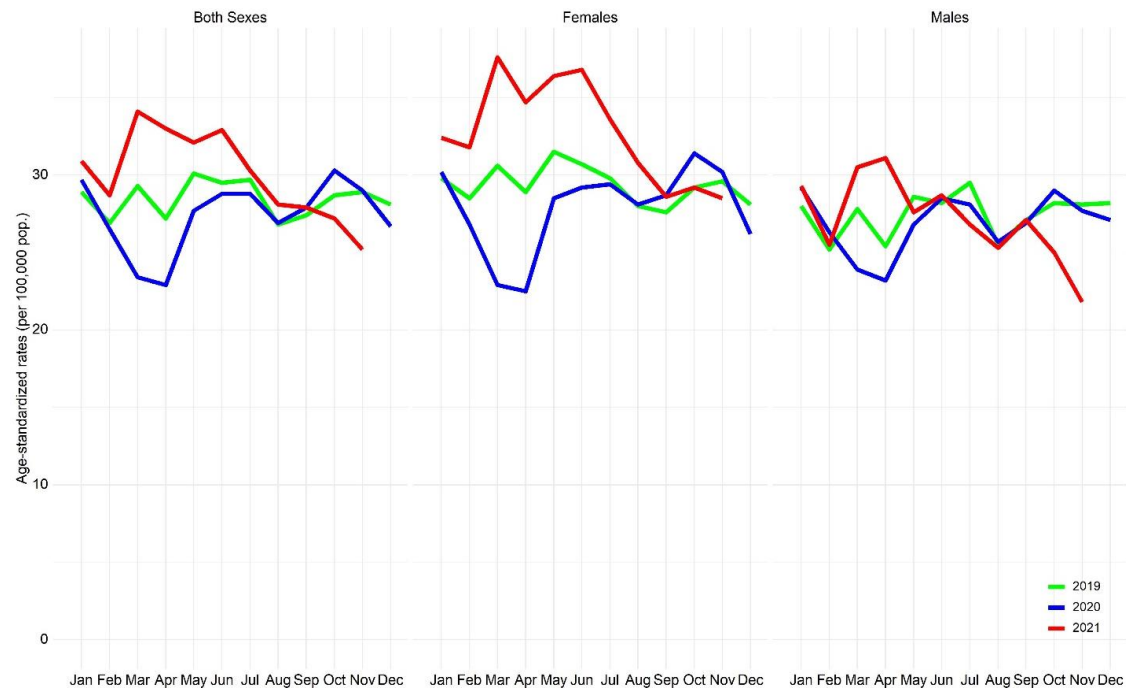

Due to lag in data, hospitalisation data for December 2021 was excluded.

Figure S5. Percent change in monthly average age-specific rates for mental health-related related outpatient physician visits, 2021 versus 2019, in British Columbia, by sex and condition

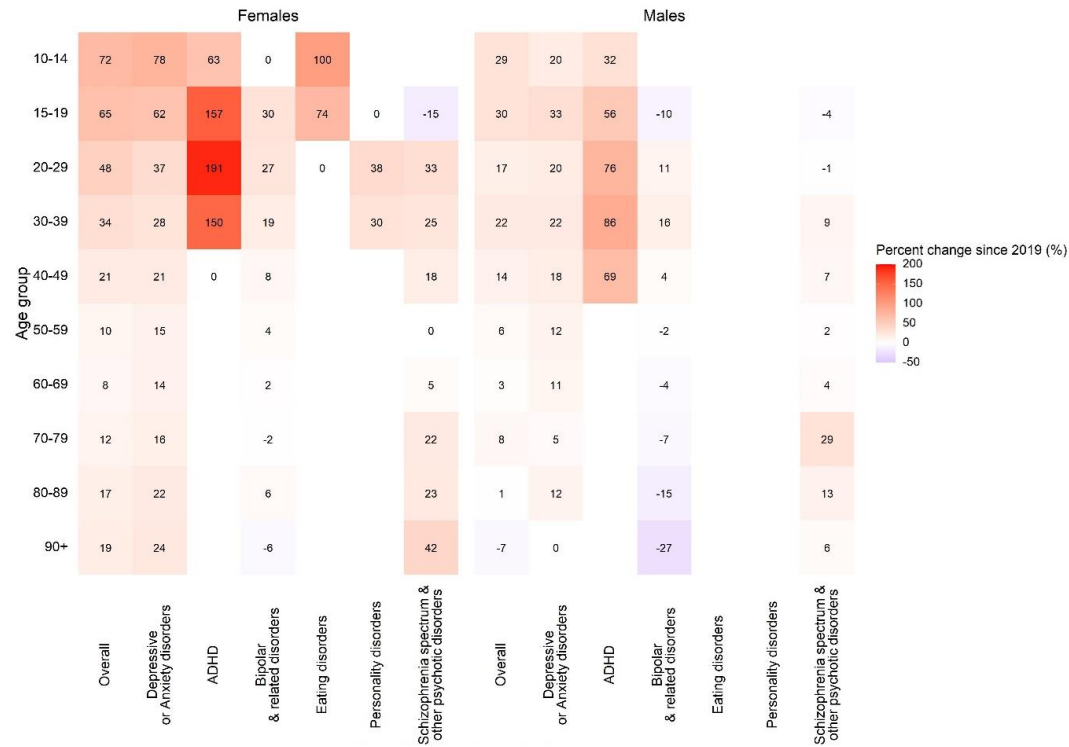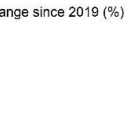

Figure S6. Percent change in monthly average age-specific rates for psychotropic drug dispensations, 2021 versus 2019, in British Columbia, by sex and type of drug

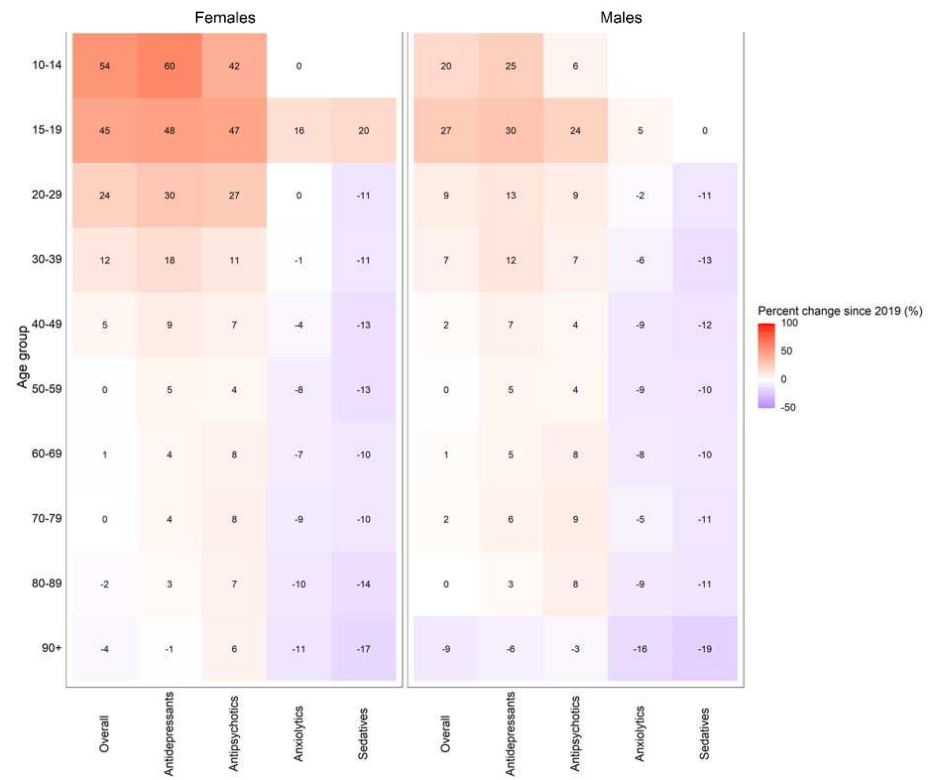

Figure S7. Percent change in monthly average age-specific rates for mental health-related emergency department visits, 2021 versus 2019, in British Columbia, by sex and condition

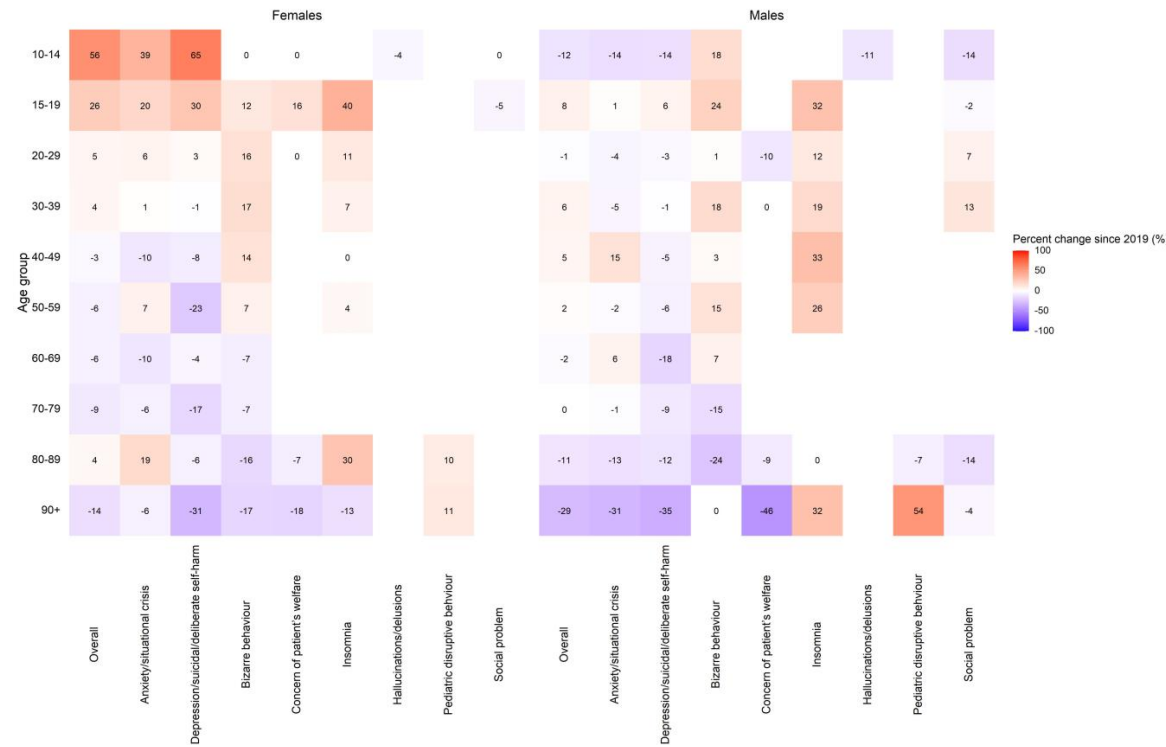

Figure S8. Percent change in monthly average age-specific rates for mental health-related hospital admissions, 2021 versus 2019, in British Columbia, by sex and condition Table

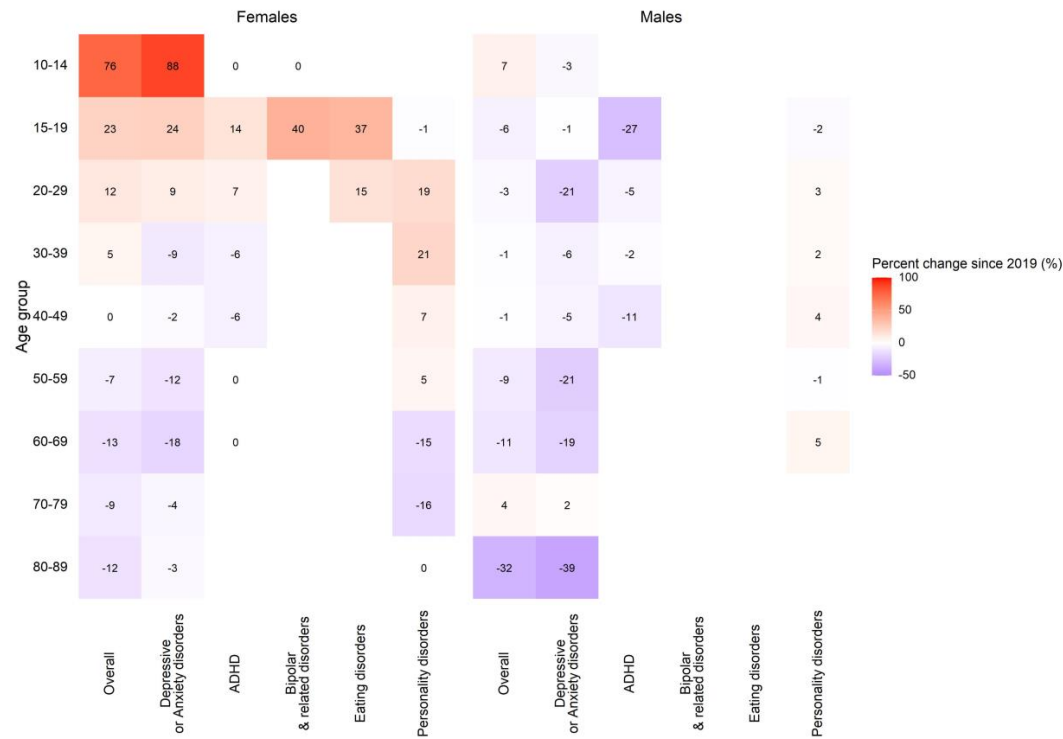

Due to lag in data, hospitalisation data for December 2021 was excluded.



Figure S9. Age-specific rates (per 1,000 population) for mental health-related outpatient physician visits in British Columbia, by year, sex and condition

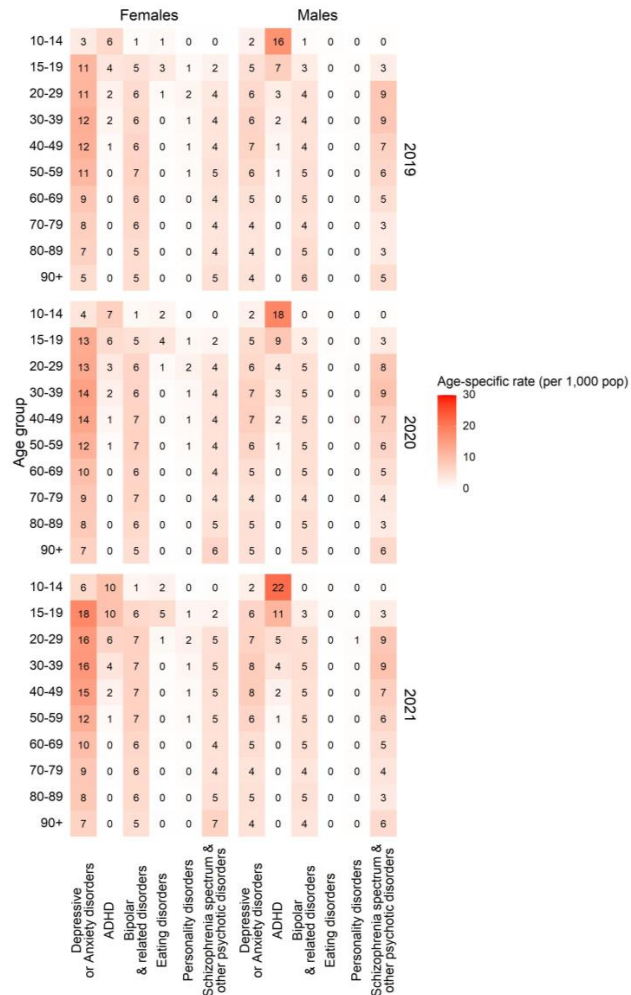

Figure S10. Age-specific rates (per 1,000 population) for psychotropic drug dispensations in British Columbia, by year, sex and condition

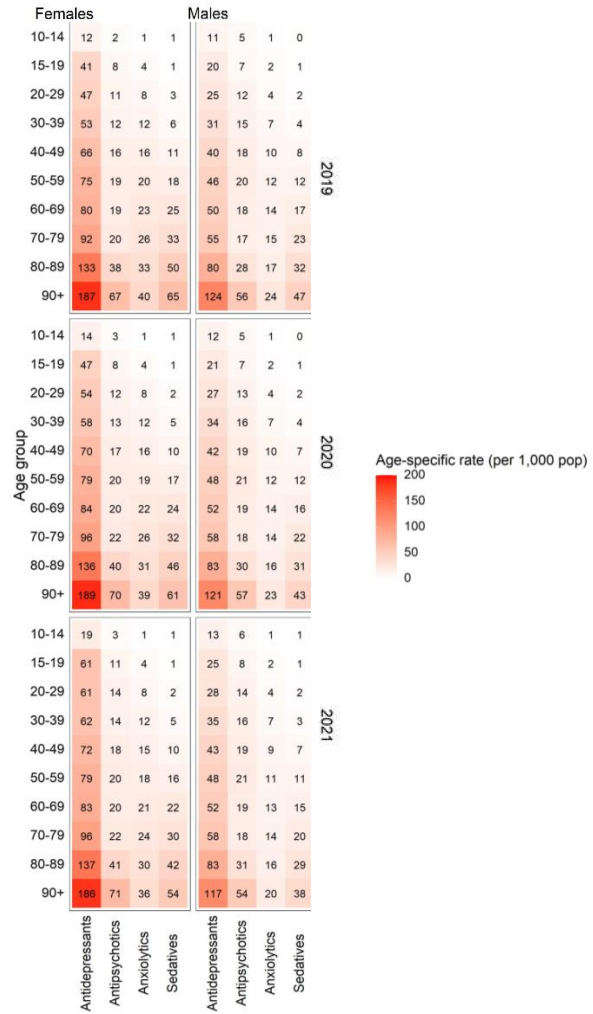

Figure S11. Age-specific rates (per 100,000 population) for mental health-related emergency department visits in British Columbia, by year, sex and condition

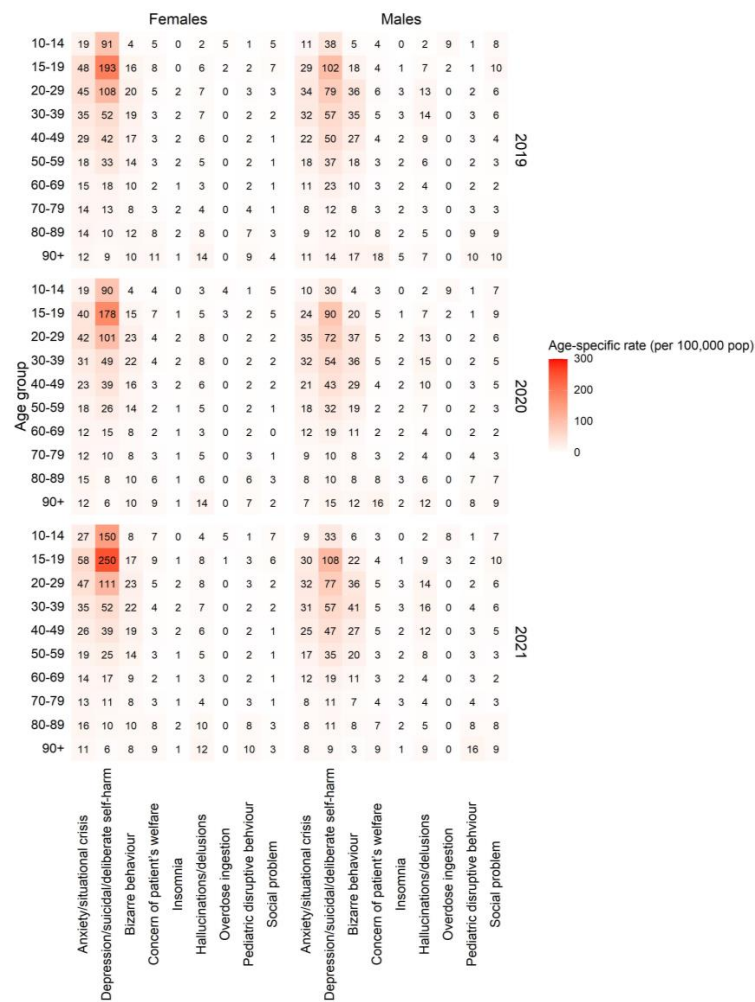

Figure S12. Age-specific rates (per 100,000 population) for mental health-related hospital admissions in British Columbia, by year, sex and condition

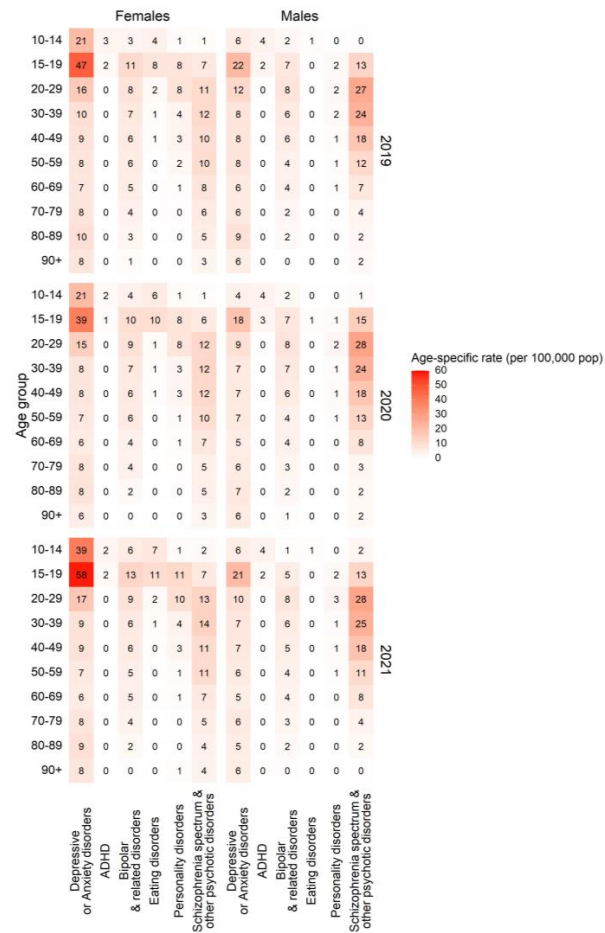

Due to lag in data, hospitalisation data for December 2021 was excluded.

## Supplementary References:

- S1. British Columbia Centre for Disease Control [creator]. Integrated COVID-19 laboratory dataset (SARS-CoV2 tests from private/public labs). Public Health Reporting Data Warehouse, British Columbia Centre for Disease Control [publisher] (2020). 2021.
- S2. British Columbia Centre for Disease Control [creator]. COVID-19 surveillance case data. British Columbia Centre for Disease Control [publisher]. (2020). 2021.
- S3. Provincial Health Services Authority [creator]. Provincial COVID-19 Monitoring Solution. Provincial Health Services Authority [publisher]. (2020). 2021.
- S4. Provincial Health Services Authority [creator]. COVID-19 vaccination data. Provincial Immunizations Registry, Provincial Public Health Information Systems [publisher]. (2020). 2021.
- S5. Provincial Health Services Authority [creator]. Provincial Public Health Information Systems [publisher]. (2020). 2021.
- S6. British Columbia Centre for Disease Control [creator]. Respiratory datamart, Public Health Reporting Data Warehouse, British Columbia Centre for Disease Control [publisher] (2020). 2021.
- S7. British Columbia Ministry of Health [creator]. Client Roster (Client Registry System/Enterprise Master Patient Index). British Columbia Ministry of Health [publisher]. Data Extract. MOH (2020). 2021. <https://www2.gov.bc.ca/gov/content/health/health-forms/online-services>
- S8. British Columbia Ministry of Health [creator]. Discharge Abstract Database (Hospital Separations). British Columbia Ministry of Health [publisher]. Data Extract. MOH (2020). 2021. <https://www2.gov.bc.ca/gov/content/health/health-forms/online-services>
- S9. British Columbia Ministry of Health [creator]. Medical Services Plan (MSP) Payment Information File. British Columbia Ministry of Health [publisher]. Data Extract. MOH (2020). 2021. <https://www2.gov.bc.ca/gov/content/health/health-forms/online-services>
- S10. British Columbia Ministry of Health [creator]. PharmaNet. British Columbia Ministry of Health [publisher]. Data Extract. MOH (2020). 2021. <https://www2.gov.bc.ca/gov/content/health/health-forms/online-services>
- S11. BC Vital Statistics Agency [creator]. Vital Statistics Deaths. BC Vital Statistics Agency [publisher]. Data Extract. BC Vital Statistics Agency (2020). 2021. <https://www2.gov.bc.ca/gov/content/health/health-forms/online-services>
- S12. British Columbia Ministry of Health [creator]. National Ambulatory Care Reporting System. British Columbia Ministry of Health [publisher]. Data Extract. MOH (2020). 2021. <https://www2.gov.bc.ca/gov/content/health/health-forms/online-services>
- S13. British Columbia Ministry of Health [creator]. Chronic Disease Registry. British Columbia Ministry of Health [publisher]. Data Extract. MOH (2020). 2020. <https://www2.gov.bc.ca/gov/content/health/health-forms/online-services>
- S14. British Columbia Ministry of Health [creator]. 811 calls. British Columbia Ministry of Health [publisher]. Data Extract. MOH (2020). 2021.

- <https://www2.gov.bc.ca/gov/content/health/health-forms/online-services>
- S15. British Columbia Ministry of Health [creator]. Health System Matrix. British Columbia Ministry of Health [publisher]. Data Extract. MOH (2020). 2021. <https://www2.gov.bc.ca/gov/content/health/health-forms/online-services>
- S16. British Columbia Ministry of Health [creator]. Population Grouper Methodology. British Columbia Ministry of Health [publisher]. Data Extract. MOH (2020). 2021. <https://www2.gov.bc.ca/gov/content/health/health-forms/online-services>
- S17. BC Statistics. BC Population Estimates & Projections for British Columbia. <https://bcstats.shinyapps.io/popApp/> (accessed on 7 Mar, 2022).
- S18. British Columbia's Ministry of Health. Medical Services Plan data set | Population Data BC. Accessed March 15, 2022. <https://www.popdata.bc.ca/data/health/msp>
- S19. British Columbia's Ministry of Health. National Ambulatory Care Reporting System data set | Population Data BC. <https://www.popdata.bc.ca/data/health/nacrs> (accessed on 15 Mar, 2022).
- S20. British Columbia's Ministry of Health. Discharge Abstracts Database (Hospital Separations) data set | Population Data BC. <https://www.popdata.bc.ca/data/health/dad> (accessed on 6 Apr, 2022).
- S21. British Columbia's Ministry of Health. PharmaNet data set. Accessed April 6, 2022. <https://www.popdata.bc.ca/data/health/pharmanet> (accessed on 6 Apr, 2022).
- S22. Government of British Columbia. Diagnostic Code Descriptions (ICD-9) - Province of British Columbia. <https://www2.gov.bc.ca/gov/content/health/practitioner-professional-resources/msp/physicians/diagnostic-code-descriptions-icd-9> (accessed on 8 Mar, 2022).
